# Supplementary material
Source: publisher site journal article supplement (https://www.dovepress.com/article/359510)
Supplement: Supplementary file 1 [file get_supplementary_file.php]

Comparison of Real-world Dose and Consumption for two Extended Half-life Recombinant Factor VIII Products for the Treatment of Hemophilia A in the United States

Yanyu Wu1; Shawn X. Sun1; Tao Fan2

**Author affiliations**

1Global Evidence & Outcomes, Data Sciences Institute, Research and Development, Takeda Development Center Americas, Inc., Cambridge, MA, USA

2US Health Economics and Outcomes Research, Takeda Pharmaceuticals USA, Inc., Lexington, MA, USA

Correspondence:

Yanyu Wu, Global Evidence & Outcomes, Data Sciences Institute, Research and Development, Takeda Development Center Americas, Inc., 40 Landsdowne Street, Cambridge, MA, USA
Tel +1 617-955-6408
Email [yanyu.wu@takeda.com](mailto:yanyu.wu@takeda.com)

**Supplementary material**

**Supplementary Table 1** Weekly Consumption (IU/kg) for Patients Receiving Efmoroctocog Alfa or Rurioctocog Alfa Pegol Using Only 2017 Data

| **Statistic** | **Efmoroctocog Alfa** | | | | **Rurioctocog Alfa Pegol** | | |
| --- | --- | --- | --- | --- | --- | --- | --- |
| **Age Missing** | **Age <12 Years** | **Age ≥12 Years** | **Alla** | **Age <12 Years** | **Age ≥12 Years** | **All** |
| **Dispensing records, n** | 115 | 278 | 689 | 1082 | 38 | 413 | 451 |
| **Estimated weekly prophylactic dose (IU/kg)** |  |  |  |  |  |  |  |
| Mean | 99.6 | 111.2 | 102.6 | 104.5 | 88.3 | 91.6 | 91.3 |
| 95% CI | 93.0–106.2 | 99.4–123.0 | 98.6–106.6 | 100.5–108.5 | 77.7–99.0 | 87.7–95.4 | 87.6–94.9 |
| SD | 35.6 | 99.6 | 54.0 | 67.5 | 32.4 | 40.0 | 39.4 |
| Median | 95.5 | 87.5 | 92.8 | 92.2 | 89.2 | 86.3 | 86.4 |
| IQR | 79.7–113.9 | 65.6–126.6 | 71.2–113.8 | 71.1–115.7 | 56.1–106.6 | 67.1–108.5 | 66.6–108.5 |

**Note:** Subgroup analyses were performed on data from one complete year (2017) after both compounds had been approved for use in the US for ≥1 year.

aIncludes the 115 records with age missing.

**Abbreviation:** IQR, interquartile range.

**Supplementary Figure 1** Infusion Frequency for (A) Efmoroctocog Alfaa and (B) Rurioctocog Alfa Pegolb


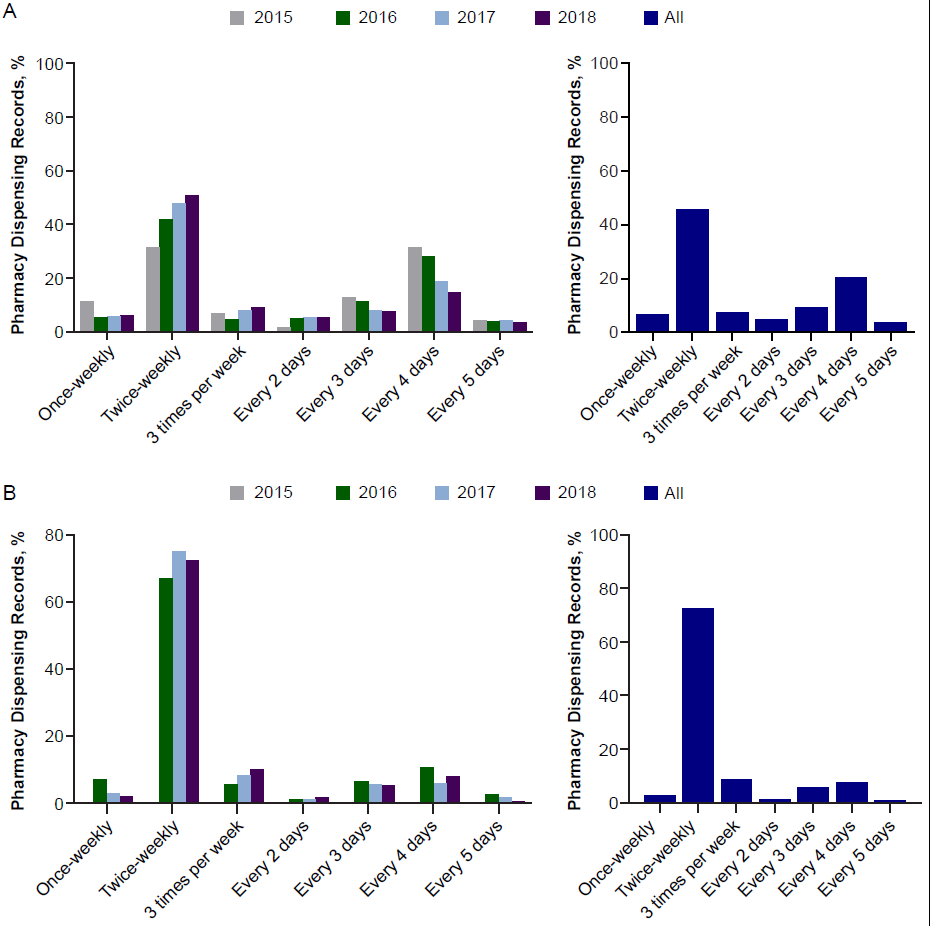


**Note:** Percentages may not total 100%, as some records included alternative regimens.

aFollowing US approval in June 2014, data for efmoroctocog alfa were available from 2015 to 2018.

bFollowing US approval in November 2015, data for rurioctocog alfa pegol were available from 2016 to 2018.
